# Supplementary material
Source: Elsevier journal article supplement (https://www.sciencedirect.com/science/article/pii/S0870255122000361)
Supplement: mmc1 [file S0870255122000361:mmc1.doc]

**Supplementary Material**

| **Appendix 1.** Univariate analysis of factors associated with inpatient mortality in 173 patients admitted with infective endocarditis. | | | | |
| --- | --- | --- | --- | --- |
| **Survivors No Survivors value Effect**  **% (n=148) % (n=25) p *(χ2)* Size** (**Φ)** | | | | |
| ***Demographics***  Group 1  Gender Male  Age (years) | 43.2 (64)  68.9 (102)  57.42±17.1 | 64.0 (16)  52.0 (13)  66.12±17.1 | 0.054  0.097  **0.020** *t* | 0.146  0.126  *d=0*.508 |
| ***Acquisition Mode***  Community  Healthcare Systems  - Nosocomial  - Non-nosocomial  Drug addiction | 63.5 (94)  23.0 (34)  12.8 (19)  0.7 (1) | 60.0 (15)  24.0 (6)  16.0 (4)  0.0 (0) | 0.944 | φ=0c.047 |
| ***Cardiac prostheses***  Prosthetic valve  Biological valve  Mechanical vale  Prosthetic material  Intracardiac devices | 25.7 (38)  10.8 (16)  14.9 (22)  1.4 (2)  11.5 (17) | 40.0 (10)  20.0 (5)  20.0 (5)  16.0 (4)  0.0 (0) | 0.139  0.193  0.513  **<0.001** ‡  0.074 | 0.112  0.099  0.050  0.281  0.136 |
| ***Previous heart disease***  Previous endocarditis  Rheumatic heart disease  Congenital heart disease  Valvular disease  HCM | 4.7 (7)  9.5 (14)  6.8 (10)  31.8 (47)  2.7 (4) | 8.0 (2)  8.0 (2)  0.0 (0)  44.0 (11)  0.0 (0) | 0.496 ‡  0.816 ‡  0.181  0.230  0.406 ‡ | 0.052  0.018  0.102  0.091  0.063 |
| ***Comorbidities***  Cardiovascular  Renal  Pulmonary  Chronic liver disease  Gastrointestinal  HIV +  HBV +  HCV +  Diabetes  Immunosuppression  Neoplasia | 66.2 (98)  6.8 (10)  10.1 (15)  6.1 (9)  27.0 (40)  7.4 (11)  8.8 (13)  11.5 (17)  18.9 (28)  7.4 (11)  8.1 (12) | 84.0 (21)  12.0 (3)  8.0 (2)  4.0 (1)  36.0 (9)  4.0 (1)  8.0 (2)  8.0 (2)  12.0 (3)  4.0 (1)  12.0 (3) | 0.076  0.358  0.740 ‡  0.680 ‡  0.357  0.532 ‡  0.898 ‡  0.606 ‡  0.404 ‡  0.532 ‡  0.522 ‡ | 0.135  0.070  0.025  0.031  0.070  0.048  0.010  0.039  0.063  0.048  0.049 |
| ***Possible points of entry***  IV drug abuse  Active drug abuse  Previous invasive procedures  - Considered for prophylaxis  - Not considered for prophylaxis | 12.2 (18)  12.0 (17)  4.1 (6)  33.1 (49) | 12.0 (3)  8.3 (2)  0.0 (0)  36.0 (9) | 0.982 ‡  0.605 ‡    0.585 | 0.002  0.040  φ=0c.079 |
| ***IE prophylaxis***  Indication for prophylaxis  Underwent prophylaxis | 1.4 (2)  0.0 (0) | 0.0 (0)  0.0 (0) | 0.559 ‡  0.306 ‡ | 0.044  0.078 |
| ***Signs and symptoms***  Fever  General symptoms  Dyspnea  Chest pain  Other  Heart murmur  Vascular phenomena  Immunological phenomena  Heart failure  Neurological deficit  Pulmonary embolism/infiltration  Peripheral abscesses | 84.9 (124)  84.8 (123)  36.6 (53)  11.7 (17)  54.2 (77)  57.5 (84)  21.8 (32)  4.8 (7)  38.8 (57)  22.4 (33)  19.7 (29)  4.1 (6) | 79.2 (19)  87.5 (21)  29.2 (2)  4.2 (1)  45.8 (9)  50.0 (12)  25.0 (6)  0.0 (0)  40.0 (10)  32.0 (8)  29.2 (7)  12.0 (3) | 0.474  0.733  0.484 ‡  0.266 ‡  0.446  0.490  0.724  0.275 ‡  0.908  0.300  0.293  0.100 ‡ | 0.055  0.026  0.054  0.086  0.059  0.053  0.027  0.083  0.009  0.079  0.080  0.125 |
| ***Analytical parameters***  Anemia  Thrombocytopenia  Thrombocytosis  Leukocytosis  Leukopenia  Neutrophilia  High CRP  High ESR  Elevated urea  Elevated Creatinine  Elevated GOT  High GPT  Elevated direct bilirubin  Elevated total bilirubin  Hematuria  Proteinuria  Leukocyturia | 84.5 (125)  31.8 (47)  5.4 (8)  47.3 (70)  3.4 (5)  69.6 (103)  94.4 (136)  87.5 (77)  43.8 (64)  32.4 (47)  30.5 (43)  30.1 (43)  22.1 (25)  22.8 (28)  13.6 (17)  7.6 (9)  11.2 (14) | 84.0 (21)  48.0 (12)  4.0 (1)  52.0 (13)  0.0 (0)  80.0 (20)  92.0 (23)  77.8 (7)  60.0 (15)  52.0 (13)  37.5 (9)  34.8 (8)  38.9 (7)  29.2 (7)  14.3 (3)  19.0 (4)  19.0 (4) | 0.953  0.113  0.770 ‡  0.663  0.351 ‡  0.288  0.633  0.415  0.134  0.058  0.495  0.649  0.124  0.501  0.933 ‡  0.095 ‡  0.311 ‡ | 0.004  0.120  0.022  0.033  0.071  0.081  0.037  0.083  0.115  0.145  0.053  0.035  0.134  0.056  0.007  0.141  0.084 |
| ***Other ECD***  De novo ECG alterations  Alterations on chest X-ray  TTE  TEE  Both | 5.6 (8)  57.3 (71)  16.2 (24)  37.8 (56)  39.9 (59) | 16.7 (4)  72.7 (16)  32.0 (8)  44.0 (11)  16.0 (4) | 0.050 ‡  0.173    0.087 | 0.151  0.113  φ=0c.195 |
| ***Location of Infection***  IE right side  IE left side  Native valve  Prosthetic valve  Intracardiac devices  Other locations | 21.6 (32)  66.9 (99)  67.6 (100)  18.4 (27)  8.1 (12)  2.7 (4) | 4.0 (1)  76.0 (19)  60.0 (15)  28.0 (7)  0.0 (0)  0.0 (0) | 0.084  0.206 | φ=0c.169  φ=0c.185 |
| ***Vegetation***  Detected on echocardiogram  Size ≥10 mm  Size ≥15 mm | 87.2 (129)  51.3 (60)  18.8 (22) | 80.0 (20)  38.9 (7)  5.6 (1) | 0.338  0.328  0.164 ‡ | 0.085  0.084  0.120 |
| ***Valve insufficiency***  No insufficiency  Mild  Moderate  Severe | 74.7 (109)  12.9 (19)  19.7 (29)  26.5 (39)  33.3 (49) | 62.5 (15)  8.3 (2)  29.2 (7)  25.0 (6)  37.5 (9) | 0.214  0.677 | 0.095  φ=0c.136 |
| ***Periannular complications***  Perforation  Abscess  Chordae rupture  Prosthesis dehiscence | 21.6 (32)  9.5 (14)  3.4 (5)  11.6 (17) | 4.2 (1)  12.0 (3)  0.0 (0)  24.0 (6) | **0.044** ‡  0.693 ‡  0.351 ‡  0.091 | 0.154  0.030  0.071  0.129 |
| ***Pulmonary hypertension (PSAP)*** | 81.3 (61) | 100.0 (13) | 0.089 | 0.181 |
| ***LV Systolic Function***  Preserved  Dysfunction | 93.8 (136)  6.2 (9) | 79.2 (19)  20.8 (5) | **0.016** | 0.185 |
| ***Blood cultures***  >2 blood cultures +  Blood cultures + fungi  Negative BC  *Staphylococcus aureus*  *Staphylococcus Coagulase*  - negative  *Streptococcus bovis*  *Streptococcus viridians*  *Enterococcus*  Other *Streptococcus*  Gram-negative bacteria  Fungi  HACEK  Other agents  Multidrug-resistant agent  Serologies + | 76.4 (113)  2.1 (3)  21.2 (31)  20.5 (30)  18.5 (27)  10.3 (15)  3.4 (5)  5.5 (8)  10.3 (15)  6.2 (9)  0.0 (0)  0.7 (1)  3.4 (5)  22.3 (33)  7.8 (11) | 72.0 (18)  4.0 (1)  32.0 (8)  20.0 (5)  20.0 (5)  4.0 (1)  0.0 (0)  8.0 (2)  8.0 (2)  4.0 (1)  4.0 (1)  0.0 (0)  0.0 (0)  28.0 (7)  0.0 (0) | 0.639  0.552 ‡  0.236  0.950  0.858    0.320 ‡  0.348 ‡  0.620 ‡  0.726 ‡  0.670 ‡  **0.015** ‡  0.678 ‡  0.348 ‡  0.532 ‡  0.148 ‡ | 0.036  0.045  0.091  0.005  0.014  0.076  0.072  0.038  0.027  0.033  0.185  0.032  0.072  0.048  0.112 |
| Evolution time  Diagnostic time  Hospitalization time | 35.12±51.4  8.73±14.5  36.74±26.2 | 24.17±28.1  8.71±8.5  26.25±28.2 | 0.311 *t*  0.997 *t*  0.074 *t* | *d=0*.506  *d=0*.001  *d=0*.385 |
| ***Treatment***  Previous ATB  ATB basis  Empirical  Targeted  Both  Duration of ATB | 45.2 (66)  32.9 (48)  5.5 (8)  61.6 (90)  30.37±15.4 | 45.8 (11)  37.5 (9)  16.7 (4)  45.8 (11)  16.48±12.0 | 0.954    0.098    **<0.001** *t* | 0.004  φ=0c.165  *d=1*.00 |
| ***Complications***  Valve insufficiency after treatment  Mild  Moderate  Severe  Persistence of vegetations  HF Persistence  Renal insufficiency  Glomerulonephritis  Pulmonary complications  Neurological complications  Septic shock  Periannular complications  Other complications | 84.4 (124)  22.6 (33)  21.2 (31)  32.9 (48)  50.7 (73)  35.8 (53)  32.6 (47)  2.7 (4)  18.9 (28)  10.8 (16)  4.1 (6)  19.6 (29)  22.3 (33) | 91.7 (22)  34.8 (8)  26.1 (6)  26.4 (6)  45.8 (11)  68.0 (17)  56.0 (14)  0.0 (0)  40.0 (10)  20.0 (5)  33.3 (8)  16.0 (4)  58.3 (14) | 0.347    0.617    0.659  **0.002**  **0.025**  0.406 ‡  **0.019**  0.193  **<0.001**  0.672 ‡  **<0.001** | 0.072  φ=0c.145  0.034  0.231  0.173  0.063  0.179  0.099  0.371  0.032  0.280 |
| BC: blood culture; HCM: hypertrophic cardiomyopathy; HIV: human immunodeficiency virus; HBV: hepatitis B virus; HCV: hepatitis C virus; IE: infective endocarditis; IV: intravenous; ECG: electrocardiogram; CRP: C-reactive protein; ESR: Sedimentation rate; GOT: glutamic oxalacetic transaminase; GPT: glutamic pyruvic transaminase; ECD - complementary diagnostic tests; TTE: transthoracic echocardiogram; TEE: transesophageal echocardiogram; PASP: pulmonary artery systolic pressure; LV: left ventricle; ATB: antibiotic therapy; χ2: Chi-squared; ‡: Fisher's exact test; *t:* Student's t-test; Φ- Phi value; φc: Cramer's V; *d:* Cohen's *d.* | | | | |

| **Appendix 2.** Univariate analysis of factors associated with inpatient or urgent (short-term) surgery mortality in 173 patients admitted with infective endocarditis. | | | | |
| --- | --- | --- | --- | --- |
| **Survivors Death/Emergent Surgery value**  **%(n=103) % (n=70) p *(χ2)*** | | | | **Effect**  **Size** (**Φ)** |
| ***Demographic***  Group 1  Gender Male  Age (years) | 35.9 (37)  69.9 (172)  57.31±17.8 | 61.4 (43)  61.4 (43)  60.69±16.5 | **0.001**  0.247  0.210 *t* | 0.251  0.088  *d=0*.197 |
| ***Acquisition Mode***  Community  Healthcare Systems  - Nosocomial  - Non-nosocomial  Drug addiction | 62.1 (64)  25.2 (26)  11.7 (12)  1.0 (1) | 64.3 (45)  20.0 (14)  15.7 (11)  0.0 (0) | 0.632 | φ=0c.100 |
| ***Cardiac prostheses***  Prosthetic valve  Biological valve  Mechanical vale  Prosthetic material  Intracardiac devices | 22.3 (23)  6.8 (7)  15.5 (16)  1.9 (2)  7.8 (8) | 35.7 (25)  20.0 (14)  15.7 (11)  5.7 (4)  12.9 (9) | 0.054  **0.009**  0.974  0.183 ‡  0.270 | 0.147  0.198  0.002  0.101  0.084 |
| ***Previous heart disease***  Previous endocarditis  Rheumatic heart disease  Congenital heart disease  Valve disease  HCM | 5.8 (6)  8.7 (9)  5.8 (6)  31.1 (32)  2.9 (3) | 4.3 (3)  10.0 (7)  5.7 (4)  37.1 (26)  1.4 (1) | 0.654 ‡  0.779  0.976 ‡  0.406  0.524 ‡ | 0.034  0.021  0.002  0.063  0.048 |
| ***Comorbidities***  Cardiovascular  Renal  Pulmonary  Chronic liver disease  Gastrointestinal  HIV +  HBV +  HCV +  Diabetes  Immunosuppression  Neoplasia | 63.1 (65)  6.8 (7)  10.7 (11)  7.8 (8)  32.0 (33)  9.7 (10)  10.7 (11)  13.6 (14)  21.4 (22)  9.7 (10)  8.7 (9) | 77.1 (54)  8.6 (6)  8.6 (6)  2.9 (2)  22.9 (16)  2.9 (2)  5.7 (4)  7.1 (5)  12.9 (9)  2.9 (2)  8.6 (6) | 0.051  0.664  0.648  0.174‡  0.188  0.082 ‡  0.255 ‡  0.183  0.152  0.082 ‡  0.970 | 0.149  0.033  0.035  0.103  0.100  0.132  0.087  0.101  0.109  0.132  0.003 |
| ***Possible points of entry***  IV drug abuse  Active drug abuse  Previous invasive procedures  - Considered for prophylaxis  - Not considered for prophylaxis | 14.6 (15)  14.1 (14)  2.9 (3)  34.0 (35) | 8.6 (6)  7.5 (5)  4.3 (3)  32.9 (23) | 0.236  0.185  0.886 | 0.090  0.103  φ=c 0.037 |
| ***Infective endocarditis prophylaxis***  Indication for prophylaxis  Underwent prophylaxis | 1.0 (1)  0.0 (0) | 1.4 (1)  0.0 (0) | 0.782 ‡  0.687 ‡ | 0.021  0.037 |
| ***Signs and symptoms***  Fever  General Symptoms  Dyspnea  Thoracalgia  Other  Heart murmur  Vascular phenomena  Immunological phenomena  Heart failure  Neurological deficit  Pulmonary embolism/infiltration  Peripheral abscesses | 88.2 (90)  85.1 (86)  33.7 (34)  12.9 (13)  53.5 (53)  57.8 (59)  23.5 (24)  5.9 (6)  32.4 (33)  25.5 (26)  22.5 (23)  4.9 (5) | 77.9 (53)  85.3 (58)  38.2 (26)  7.4 (5)  52.2 (35)  54.4 (37)  20.3 (14)  1.4 (1)  48.6 (34)  21.4 (15)  18.8 (13)  5.7 (4) | 0.072  0.979  0.542  0.254  0.870  0.658  0.617  0.151‡  **0.032**  0.539  0.560  0.814 ‡ | 0.138  0.002  0.047  0.088  0.013  0.034  0.038  0.110  0.163  0.047  0.045  0.018 |
| ***Analytical parameters***  Anemia  Thrombocytopenia  Thrombocytosis  Leukocytosis  Leukopenia  Neutrophilia  High CRP  High ESR  Elevated urea  Elevated Creatinine  Elevated GOT  High GPT  Elevated direct bilirubin  Elevated total bilirubin  Hematuria  Proteinuria  Leukocyturia | 84.5 (87)  30.1 (31)  5.8 (6)  45.6 (47)  4.9 (5)  63.1 (65)  94.1 (95)  84.6 (55)  40.8 (42)  28.4 (29)  27.6 (27)  29.0 (29)  16.5 (14)  19.1 (17)  14.0 (13)  9.8 (9)  10.8 (10) | 84.3 (59)  40.0 (28)  4.3 (3)  51.4 (36)  0.0 (0)  82.9 (58)  94.1 (64)  90.6 (29)  54.4 (37)  45.6 (31)  37.3 (25)  33.3 (22)  39.1 (18)  31.0 (18)  13.2 (7)  8.3 (4)  15.1 (8) | 0.974  0.177  0.654 ‡  0.454  0.061 ‡  **0.005**  0.987  0.414  0.080  **0.022**  0.185  0.554  **0.004**  0.097  0.896  0.779 ‡  0.443 | 0.002  0.103  0.034  0.057  0.142  0.214  0.001  0.083  0.134  0.176  0.103  0.046  0.252  0.137  0.011  0.024  0.064 |
| ***Other exams***  De novo ECG alterations  Alterations on chest X-ray  TTE  TEE  Both | 2.0 (2)  53.3 (48)  19.4 (20)  35.9 (37)  35.9 (37) | 14.9 (10)  69.6 (39)  17.1 (12)  42.9 (30)  37.1 (26) | **0.001** ‡  0.051  0.404 | 0.246  0.162  φ=0c.130 |
| ***Location of Infection***  IE right side  IE left side  Native valve  Prosthetic valve  Intracardiac devices  Other locations | 22.3 (23)  64.1 (66)  71.8 (74)  6.8 (7)  3.9 (4)  3.9 (4) | 14.3 (10)  74.3 (52)  58.6 (41)  18.6 (13)  11.4 (8)  0.0 (0) | 0.332  **0.015** | 0.113  φ=0c.268 |
| ***Vegetation***  Echo detection  Size ≥10 mm  Size ≥15 mm | 85.4 (88)  45.1 (37)  13.4 (11) | 87.1 (61)  56.6 (30)  22.6 (12) | 0.750  0.193  0.164 | 0.024  0.112  0.120 |
| ***Valvular insufficiency***  No insufficiency  Mild  Moderate  Severe | 74.5 (76)  15.7 (16)  24.5 (25)  24.5 (25)  28.4 (29) | 70.6 (48)  7.2 (5)  15.9 (11)  29.0 (20)  42.0 (49) | 0.573  0.249 | 0.043  φ=0c.197 |
| ***Periannular complications***  Perforation  Abscess  Chordae rupture  Prosthesis dehiscence | 18.4 (19)  3.9 (4)  1.9 (2)  7.8 (8) | 20.3 (14)  18.6 (13)  4.3 (3)  21.4 (15) | 0.763  **0.001** ‡  0.366 ‡  **0.010** | 0.023  0.242  0.069  0.196 |
| ***Pulmonary hypertension (PSAP)*** | 80.9 (38) | 87.8 (36) | 0.374 | 0.095 |
| ***LV systolic function***  Preserved  Dysfunction | 96.0 (97)  4.0 (4) | 85.3 (58)  14.7 (10) | **0.013** | 0.191 |
| ***Blood cultures***  >2 Blood cultures +  Blood cultures + fungi  Negative BC  *Staphylococcus aureus*  *Staphylococcus Coagulase*  - negative  *Streptococcus bovis*  *Streptococcus viridians*  *Enterococcus*  Other *Streptococcus*  Gram-negative bacteria  Fungi  HACEK  Other agents  Multidrug-resistant agent  Serologies + | 80.6 (83)  2.0 (2)  15.5 (16)  27.5 (28)  14.7 (15)  10.8 (11)  3.9 (4)  3.9 (4)  12.7 (13)  6.9 (7)  0.0 (0)  1.0 (1)  2.9 (3)  21.4 (22)  9.3 (9) | 68.6 (48)  2.9 (2)  33.3 (23)  10.1 (7)  24.6 (17)  7.2 (5)  1.4 (1)  8.7 (6)  5.8 (4)  4.3 (3)  1.4 (1)  0.0 (0)  2.9 (2)  25.7 (18)  2.9 (2) | 0.071  0.691 ‡  **0.007**  **0.006**  0.102  0.436  0.346 ‡  0.192 ‡  0.137 ‡  0.492 ‡  0.223 ‡  0.409 ‡  0.987 ‡  0.505  0.103 ‡ | 0.137  0.030  0.206  0.210  0.125  0.060  0.072  0.100  0.114  0.053  0.093  0.063  0.001  0.051  0.126 |
| Evolution time  Diagnostic time  Hospitalization time | 35.93±55.9  8.24±8.1  40.95±25.3 | 30.09±36.4  9.42±19.3  26.80±26.5 | 0.450 *t*  0.600 *t*  **0.001** *t* | *d=0*.124  *d=0*.079  *d=0*.546 |
| ***Treatment***  Previous ATB  ATB basis  Empirical  Targeted  Both  Duration of ATB | 45.6 (47)  27.2 (28)  4.9 (5)  68.0 (70)  32.72±11.6 | 44.8 (30)  43.3 (29)  10.4 (7)  46.3 (31)  22.06±18.7 | 0.913  **0.017**  **<0.001** *t* | 0.008  φ=0c.219  *d=0*.079 |
| ***Complications***  Valve insufficiency Tx  Mild  Moderate  Severe  Persistence of vegetations  HF persistence  Renal insufficiency  Glomerulonephritis  Pulmonary complications  Neurological complications  Septic shock  Periannular complications  Other complications | 82.4 (84)  29.7 (30)  19.8 (20)  22.8 (23)  47.0 (47)  27.2 (28)  31.7 (32)  3.9 (4)  22.3 (23)  12.6 (13)  2.9 (3)  9.7 (10)  24.3 (25) | 89.9 (62)  16.2 (11)  25.0 (17)  45.6 (31)  54.4 (37)  60.0 (42)  42.6 (29)  0.0 (0)  21.4 (15)  11.4 (8)  15.9 (11)  32.9 (23)  31.9 (22) | 0.173  **0.005**  0.346  **<0.001**  0.146  0.095 ‡  0.888  0.814  **0.002** ‡  **<0.001**  0.272 | 0.140  φ=0c.313  0.073  0.328  0.112  0.127  0.011  0.018  0.234  0.289  0.084 |
| BC: blood culture; HCM: hypertrophic cardiomyopathy; HIV: human immunodeficiency virus; HBV: hepatitis B virus; HCV: hepatitis C virus; IE: infective endocarditis; IV: intravenous; ECG: electrocardiogram; CRP: C-reactive protein; ESR: Sedimentation rate; GOT: glutamic oxalacetic transaminase; GPT: glutamic-pyruvic transaminase; ECD - complementary diagnostic tests; TTE: transthoracic echocardiogram; TEE: transesophageal echocardiogram; PASP: pulmonary artery systolic pressure; LV: left ventricle; ATB: antibiotic therapy; χ2: Chi-squared; ‡: Fisher's exact test; *t:* Student's t-test; Φ: Phi value; φc: Cramer's V; *d:* Cohen's *d.* | | | | |

| **Appendix 3.** Univariate analysis of factors associated with mortality at follow-up (long-term) in 170 patients admitted with IE. | | | | |
| --- | --- | --- | --- | --- |
| **Survivors No. Survivors value**  **% (n=88) % (n=57) p *(χ2)*** | | | | **Effect**  **Size** (**Φ)** |
| ***Demographic***  Group 1  Gender Male  Age (years) | 52.3 (46)  72.7 (64)  52.67±16.6 | 29.8 (17)  63.2 (36)  64.50±16.5 | **0.008**  0.224  **<0.001***t* | 0.221  0.101  *d* =0.715 |
| ***Acquisition Mode***  Community  Healthcare Systems  - Nosocomial  - Not nosocomial  Drug Addiction | 62.5 (55)  13.6 (12)  14.8 (13)  9.1 (8) | 66.7 (38)  5.3 (3)  21.1 (12)  7.0 (4) | 0.333 | φ=0c.153 |
| ***Cardiac prostheses***  Prosthetic valve  Biological valve  Mechanical vale  Prosthetic material  Intracardiac devices | 18.2 (16)  6.8 (6)  11.4 (10)  1.1 (1)  12.5 (11) | 35.1 (20)  17.5 (10)  17.5 (10)  1.8 (1)  8.8 (5) | **0.021**  **0.044**  0.292  0.755 ‡  0.484 | 0.191  0.167  0.088  0.026  0.058 |
| ***Previous heart disease***  Previous endocarditis  Rheumatic carditis  Congenital heart disease  Valve disease  HCM | 2.3 (2)  9.1 (8)  9.1 (8)  29.5 (26)  4.5 (4) | 7.0 (4)  8.8 (5)  3.5 (2)  35.1 (20)  0.0 (0) | 0.212 ‡  0.948  0.316 ‡  0.484  0.154 ‡ | 0.116  0.005  0.108  0.058  0.136 |
| ***Comorbidities***  Cardiovascular  Renal  Pulmonary  Chronic liver disease  Gastrointestinal  HIV +  HBV +  HCV +  Diabetes  Immunosuppression  Neoplasia | 63.6 (56)  2.3 (2)  11.4 (10)  4.5 (4)  20.5 (18)  9.1 (8)  10.2 (9)  13.6 (12)  13.6 (12)  8.0 (7)  8.0 (7) | 70.2 (40)  14.0 (8)  8.8 (5)  8.8 (5)  36.8 (21)  3.5 (2)  7.0 (4)  8.8 (5)  26.3 (15)  7.0 (4)  8.8 (5) | 0.416  **0.014** ‡  0.617  0.316 ‡  **0.030**  0.316  0.568 ‡  0.374  0.055  0.835 ‡  0.861 | 0.068  0.227  0.042  0.086  0.181  0.108  0.055  0.074  0.159  0.017  0.014 |
| ***Possible gateway***  IV Drug Abuse  Active drug abuse  Previous invasive procedures  - Considered for prophylaxis  - Not considered for prophylaxis | 13.6 (12)  14.3 (12)  5.7 (5)  33.0 (29) | 8.8 (5)  7.1 (4)  0.0 (0)  31.6 (18) | 0.374  0.193  0.171 | 0.074  0.110  0.156 |
| ***Prophylaxis of IE***  Indication for prophylaxis  Performing prophylaxis | 1.1 (1)  0.0 (0) | 0.0 (0)  0.0 (0) | 0.419 ‡  0.067 ‡ | 0.067  0.152 |
| ***Signs and symptoms***  Fever  General symptoms  Dyspnea  Thoracalgia  Other  Heart murmur  Vascular phenomena  Immunological phenomena  Heart failure  Neurological deficits  Pulmonary embolism/infiltration  Peripheral abscesses | 84.9 (73)  81.2 (69)  34.1 (29)  12.9 (11)  48.8 (40)  54.7 (47)  25.3 (22)  8.0 (7)  29.9 (26)  19.5 (17)  26.4 (23)  4.6 (4) | 84.2 (48)  89.5 (51)  40.4 (23)  10.5 (6)  63.2 (36)  63.2 (36)  17.5 (10)  0.0 (0)  52.6 (30)  28.1 (16)  8.8 (5)  3.5 (2) | 0.913  0.180  0.450  0.664  0.094  0.313  0.274  **0.042** ‡  **0.006**  0.234  **0.009**  0.749 | 0.009  0.112  0.063  0.036  0.142  0.084  0.091  0.183  0.228  0.099  0.218  0.027 |
| ***Analytical parameters***  Anemia  Thrombocytopenia  Thrombocytosis  Leukocytosis  Leukopenia  Neutrophilia  High PRC  High VS  Elevated urea  Elevated Creatinine  Elevated TGO  High TGP  Elevated direct bilirubin  Elevated total bilirubin  Hematuria  Proteinuria  Leukocyturia | 80.7 (71)  31.8 (28)  6.8 (6)  43.2 (38)  1.1 (1)  70.5 (62)  94.2 (81)  87.3 (48)  40.7 (35)  23.3 (20)  33.3 (28)  32.9 (28)  21.9 (14)  19.2 (14)  12.5 (9)  8.7 (6)  11.1 (8) | 89.5 (51)  31.6 (18)  3.5 (2)  50.9 (29)  7.0 (4)  66.7 (38)  94.5 (52)  87.1 (27)  47.4 (27)  44.6 (25)  27.8 (15)  25.5 (14)  21.7 (10)  27.7 (13)  14.0 (7)  6.4 (3)  10.0 (5) | 0.157  0.976  0.481 ‡  0.364  0.058  0.630  0.928  0.981  0.431  **0.007**  0.492  0.345  0.986  0.277  0.809  0.648  0.845 | 0.118  0.003  0.071  0.075  0.157  0.040  0.008  0.003  0.066  0.225  0.059  0.080  0.002  0.099  0.022  0.042  0.018 |
| ***Other exams***  De novo ECG alterations  Alterations on chest X-ray  TTE  TEE  Both | 4.7 (4)  62.0 (44)  19.3 (17)  37.5 (33)  39.8 (35) | 7.1 (4)  50.0 (25)  10.5 (6)  40.4 (23)  38.6 (22) | 0.712 ‡  0.190  0.204 | 0.053  0.119  φ=0c.178 |
| ***Location of infection***  IE right side  IE left side  Native valve  Prosthetic valve  Intracardiac devices  Other locations | 28.4 (25)  60.2 (53)  70.5 (62)  6.8 (6)  10.2 (9)  1.1 (1) | 10.5 (6)  77.2 (44)  63.2 (36)  14.0 (8)  5.3 (3)  5.3 (3) | **0.035**  0.255 | φ=0c.215  φ=0c.193 |
| ***Vegetation***  Echo detection  Size ≥10 mm  Size ≥15 mm | 87.5 (77)  50.7 (35)  17.4 (12) | 86.0 (49)  52.2 (24)  21.7 (10) | 0.789  0.879  0.561 | 0.022  0.014  0.054 |
| ***Valvular insufficiency***  No insufficiency  Mild  Moderate  Severe | 75.6 (65)  11.5 (10)  14.9 (13)  28.7 (25)  36.8 (32) | 71.9 (41)  15.8 (9)  26.3 (15)  22.8 (13)  19.8 (17) | 0.625  0.410 | 0.041  φ=0c.187 |
| ***Periannular complications***  Perforation  Abscess  Chordae rupture  Prosthesis dehiscence | 20.5 (18)  10.2 (9)  3.4 (3)  8.0 (7) | 22.8 (13)  8.8 (5)  3.5 (2)  15.8 (9) | 0.736  0.772  0.974 ‡  0.148 | 0.028  0.024  0.003  0.120 |
| ***Pulmonary hypertension (PSAP)*** | 75.0 (36) | 91.7 (22) | 0.092 | 0.199 |
| ***LV Systolic Function***  Preserved  Dysfunction | 94.2 (81)  5.8 (5) | 94.6 (53)  5.4 (3) | 0.908 | 0.010 |
| ***Blood cultures***  >2 Blood cultures +  Blood cultures + fungi  Negative BC  *Staphylococcus aureus*  *Staphylococcus Coagulase*  - negative  *Streptococcus bovis*  *Streptococcus viridians*  *Enterococcus*  Other *Streptococcus*  Gram-negative bacteria  HACEK  Other Agents  Multidrug-resistant agent  Serologies + | 76.1 (67)  1.2 (1)  24.1 (21)  21.8 (19)  17.2 (15)  8.0 (7)  3.4 (3)  4.6 (4)  11.5 (10)  5.7 (5)  1.1 (1)  2.3 (2)  14.8 (13)  7.1 (6) | 78.9 (45)  3.5 (2)  14.3 (8)  19.6 (11)  21.4 (12)  14.3 (8)  3.6 (2)  7.1 (4)  7.1 (4)  7.1 (4)  0.0 (0)  5.4 (3)  35.1 (20)  9.4 (5) | 0.693  0.563 ‡  0.153  0.753  0.532  0.235  0.969 ‡  0.712 ‡  0.566 ‡  0.737 ‡  0.421 ‡  0.380 ‡  **0.004**  0.616 | 0.033  0.080  0.120  0.026  0.052  0.099  0.003  0.054  0.071  0.028  0.067  0.081  0.237  0.043 |
| ***Evolution time***  ***Diagnostic time***  ***Hospitalization time*** | 35.49 ±57.2  7.06 ±6.2  38.75 ±24.1 | 35.04 ±42.7  11.58 ±21.6  33.79 ±29.3 | 0.960 *t*  0.144 *t*  0.268 *t* | *d=*0.009  *d=*0.284  *d=*0.184 |
| ***Treatment***  Previous ATB  ATB Basis  Empirical  Directed  Both  Duration of ATB | 48.8 (42)  34.9 (30)  4.7 (4)  60.5 (52)  32.60 ±16.5 | 40.4 (23)  28.1 (16)  5.3 (3)  66.7 (38)  26.51±13.0 | 0.318  0.694  **0.025** *t* | 0.083  φ=0c.071  *d=*0.410 |
| ***Complications***  Valvular insufficiency after Tx  Mild  Moderate  Severe  Persistence of vegetations  HF Persistence  Renal insufficiency  Glomerulonephritis  Pulmonary complications  Neurological complications  Septic shock  Periannular complications  Other complications | 84.1 (74)  18.2 (16)  23.9 (21)  31.8 (28)  42.5 (37)  31.8 (28)  28.7 (25)  3.4 (3)  26.1 (23)  10.2 (9)  2.3 (2)  20.5 (18)  19.3 (17) | 83.9 (47)  29.1 (16)  16.4 (9)  36.4 (20)  61.1 (33)  42.1 (24)  38.9 (21)  1.8 (1)  8.8 (5)  10.5 (6)  7.0 (4)  17.5 (10)  28.1 (16) | 0.979  0.259  **0.032**  0.207  0.211  0.552 ‡  **0.010**  0.954  0.212 ‡  0.665  0.220 | 0.002  φ=0c.214  0.181  0.105  0.105  0.049  0.215  0.005  0.116  0.036  0.102 |
| BC: blood culture; HCM: hypertrophic cardiomyopathy; HIV: human immunodeficiency virus; HBV: hepatitis B virus; HCV: hepatitis C virus; IE: infective endocarditis; IV: intravenous; ECG: electrocardiogram; CRP: C-reactive protein; ESR: Sedimentation rate; GOT: glutamic oxalacetic transaminase; GPT: glutamic-pyruvic transaminase; ECD - complementary diagnostic tests; TTE- transthoracic echocardiogram; TEE - transesophageal echocardiogram; PASP: pulmonary artery systolic pressure; LV: left ventricle; ATB: antibiotic therapy; χ2 - Chi-squared; ‡ **-** Fisher's exact test; *t -* Student's t-test; Φ- Phi value; φc - Cramer's V; *d:* Cohen's *d.* | | | | |

| **Appendix 4.** Mean and median survival time of the sample. | | | | |
| --- | --- | --- | --- | --- |
| **Mean ± SD 95% CI Median ± SD 95% CI**  **(years) (years)** | | | | |
| **Sample Survival**  **(n=169)** | 8.29±0.607 | 7.10-9.50 | 8.00±1.88 | 4.32-11.69 |
| SE: standard deviation; CI: confidence interval. | | | | |

| **Appendix 5.** Comparison of survival between G0 and G1. | | | | | |  |
| --- | --- | --- | --- | --- | --- | --- |
| **Mean ± SD 95% CI Median ± SD 9 5% CI**  **(days) (days)** | | | | | **Log-Rank Test** | |
| **Survival**  **G0 (n=90)** | 3226.9±279.8 | 2678.5-3775.4 | 3201.0±767.9 | 1.695.9-4706.0 | | 0.470 |
| **Survival**  **G1 (n=79)** | 1490.8±137.9 | 1220.4-1761.1 | - | - | |
| SD: standard deviation; CI: confidence Interval. | | | | | |  |
